# Supplementary material for: Highly ionic conductive, self-healable solid polymer electrolyte based on reversibly interlocked macromolecule networks for lithium metal batteries workable at room temperature
Source: Royal Society of Chemistry journal article supplement (doi:10.1039/d2ta03236h), 2022-01-01
Supplement: d2ta03236h1.pdf [file d2ta03236h1.pdf]

## Supporting Information

### Highly Ionic Conductive, Self-healable Solid Polymer Electrolyte Based on Reversibly Interlocked Macromolecule Networks for Lithium Metal Batteries Workable at Room Temperature

Zi Xin Huang<sup>a†</sup>, Zhen Hua Xie<sup>a,b,c†</sup>, Ze Ping Zhang<sup>a\*</sup>, Ting Zhang<sup>a</sup>, Min Zhi Rong<sup>a\*</sup>,  
and Ming Qiu Zhang<sup>a\*</sup>

<sup>a</sup> Key Laboratory for Polymeric Composite and Functional Materials of Ministry of  
Education, GD HPPC Lab, School of Chemistry, Sun Yat-Sen University, Guangzhou  
510275, P. R. China

<sup>b</sup> Institute of High Energy Physics, Chinese Academy of Sciences (CAS), Beijing  
100049, P. R. China

<sup>c</sup> Spallation Neutron Source Science Center, Dongguan 523803, P. R. China

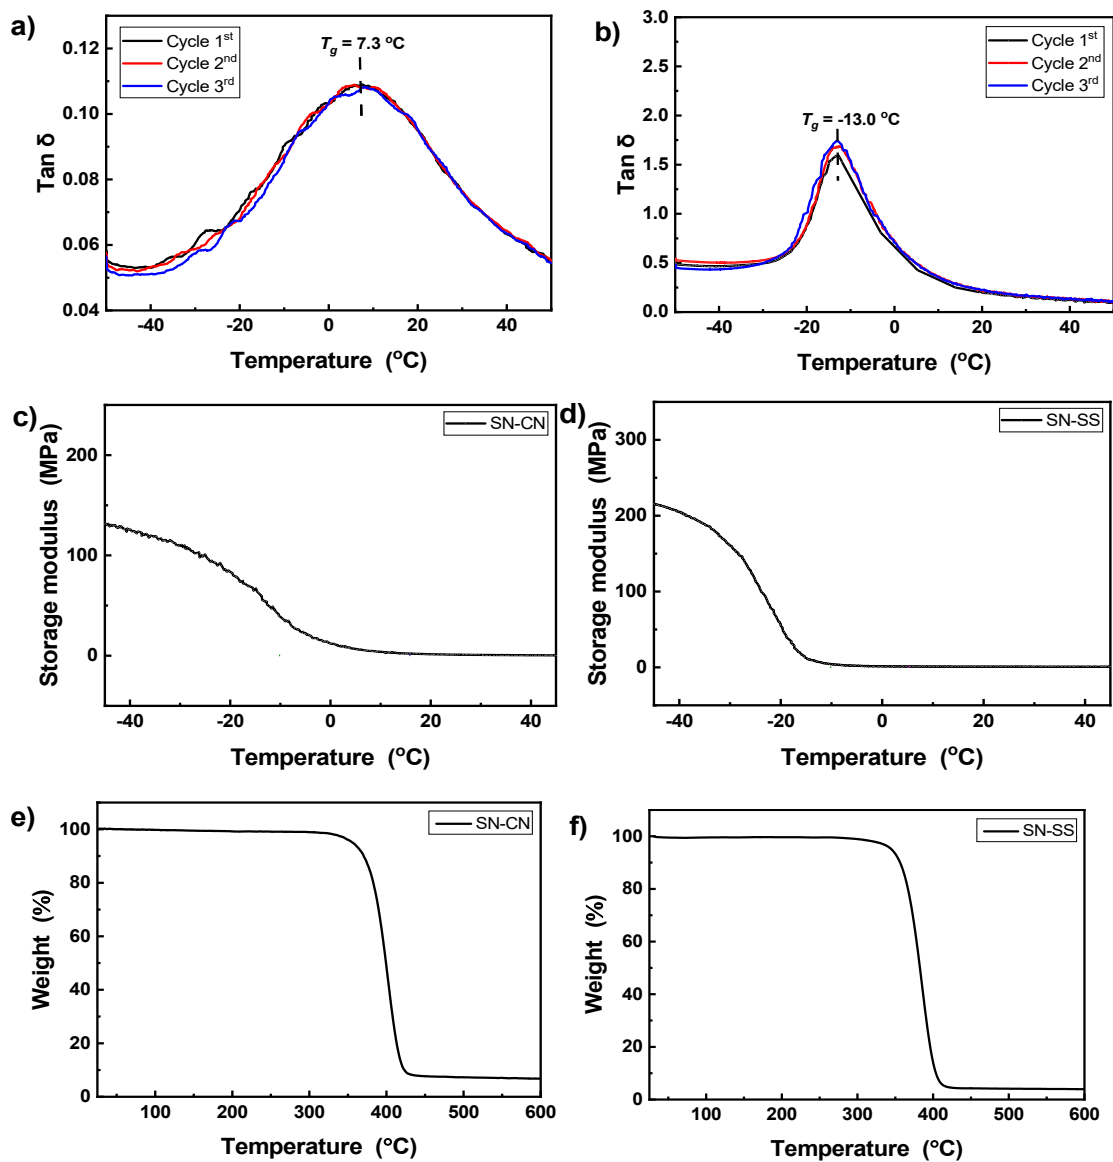

**Fig. S1.** Temperature dependence of  $\tan \delta$  and storage modulus of (a, c) SN-CN and (b, d) SN-SS measured at 1 Hz. TGA curves of (e) SN-CN and (f) SN-SS.

**Table S1.** Characterization of the SN-CN and SN-SS using DMA

| Sample | $\rho$ (g cm <sup>-3</sup> ) | $T_g$ (°C) | $M_c^a$ (g mol <sup>-1</sup> ) |
|--------|------------------------------|------------|--------------------------------|
| SN-CN  | 1.047                        | 7.3        | 4821                           |
| SN-SS  | 1.169                        | -13.0      | 4548                           |

<sup>a</sup> Molecular weight between crosslinks ( $M_c$ ) of polymer was calculated from:

$$M_c = \frac{3(1 - \frac{2}{\phi})\rho RT}{E'} \quad (\text{S1})$$

where  $\phi$  is functionality of crosslinking site,  $\rho$  density,  $R$  the universal gas constant,  $T$  absolute temperature, and  $E'$  storage modulus at rubbery plateau zone, respectively. In this work,  $E'$  values at  $T = T_g + 30$  °C were used for the calculation.

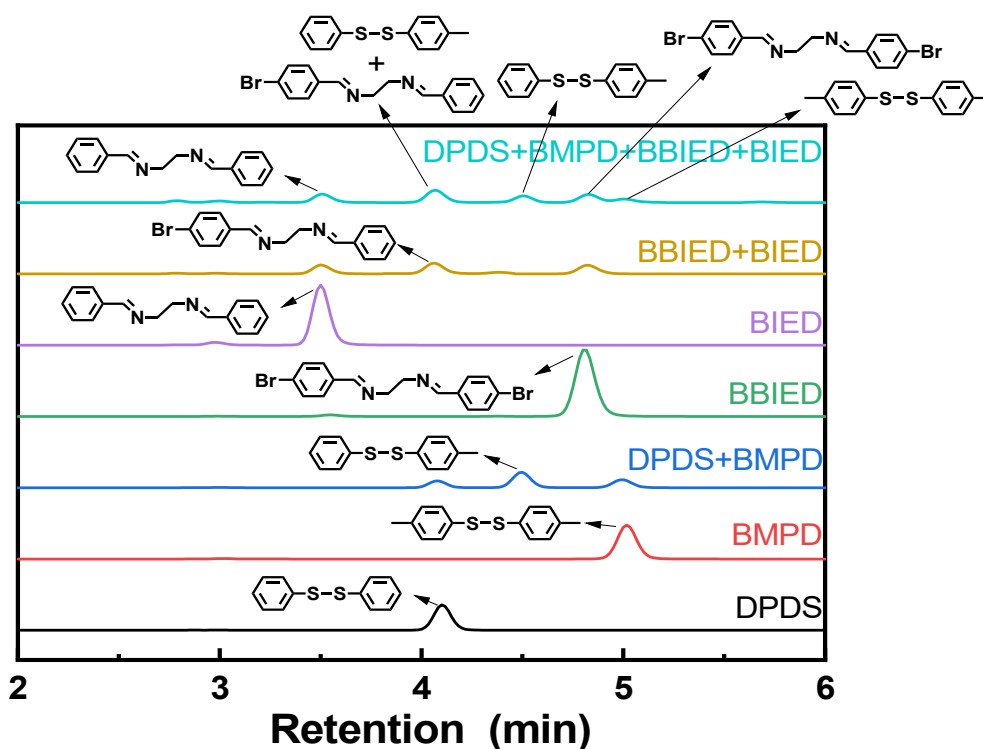

**Fig. S2.** HPLC curves of the model small molecules and their mixtures after exchange at room temperature for 2 h.

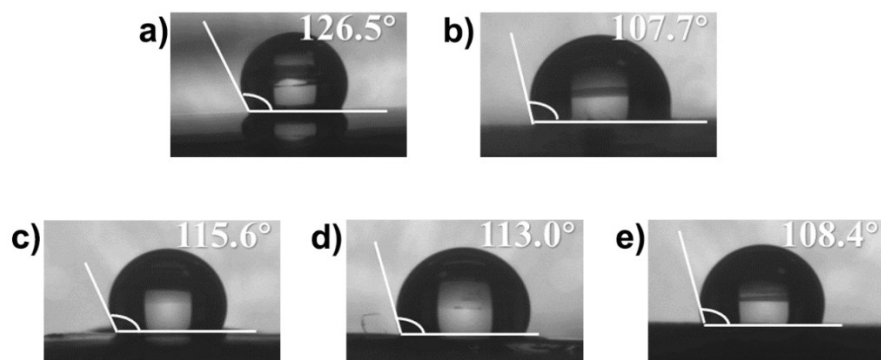

**Fig. S3.** Representative images of the water contact angles of (a) SN-CN-LiPF<sub>6</sub>, (b) SN-SS-LiPF<sub>6</sub>, (c) RILNs-3/1-LiPF<sub>6</sub>, (d) RILNs-1/1-LiPF<sub>6</sub> and (e) RILNs-1/3-LiPF<sub>6</sub>.

**Table S2.** Water contact angles and surface energies of the SPEs

| Sample                      | Contact angle<br>(°) | $\gamma_s$<br>(mJ m <sup>-2</sup> ) | $\gamma_s^d$<br>(mJ m <sup>-2</sup> ) | $\gamma_s^p$<br>(mJ m <sup>-2</sup> ) |
|-----------------------------|----------------------|-------------------------------------|---------------------------------------|---------------------------------------|
| SN-CN-LiPF <sub>6</sub>     | 126.5                | 4.16                                | 3.38                                  | 0.79                                  |
| RILNs-3/1-LiPF <sub>6</sub> | 115.6                | 26.04                               | 25.95                                 | 0.10                                  |
| RILNs-1/1-LiPF <sub>6</sub> | 113.0                | 29.21                               | 29.15                                 | 0.06                                  |
| RILNs-1/3-LiPF <sub>6</sub> | 108.4                | 32.32                               | 32.31                                 | 0.01                                  |
| SN-SS-LiPF <sub>6</sub>     | 107.7                | 33.04                               | 33.03                                 | 0.01                                  |

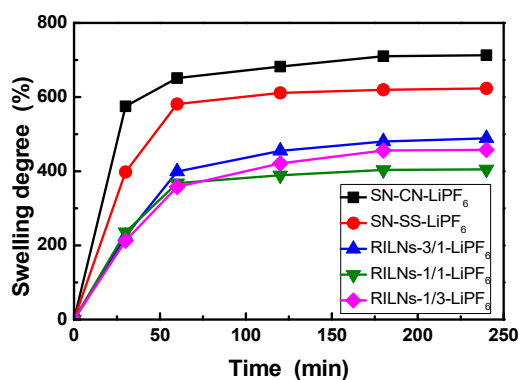

**Fig. S4.** Swelling degree as a function of time of the SPEs respectively based on the single networks and RILNs.

**Table S3.** Characterization of the SPEs using DSC and DMA

| Sample                      | $T_m$ (°C) | $\Delta H_f$ (J g <sup>-1</sup> ) | $X_c$ (%) | $T_g$ (°C) |
|-----------------------------|------------|-----------------------------------|-----------|------------|
| SN-CN-LiPF <sub>6</sub>     | 31.8       | 59.41                             | 33.61     | -7.1       |
| RILNs-3/1-LiPF <sub>6</sub> | N/A        | N/A                               | N/A       | -9.8       |
| RILNs-1/1-LiPF <sub>6</sub> | N/A        | N/A                               | N/A       | -13.1      |
| RILNs-1/3-LiPF <sub>6</sub> | N/A        | N/A                               | N/A       | -16.1      |
| SN-SS-LiPF <sub>6</sub>     | 45.2       | 63.18                             | 35.74     | -16.9      |

**Table S4.** Tensile properties of the SPEs

| Sample                      | Tensile Strength (MPa) | Elongation at break (%) |
|-----------------------------|------------------------|-------------------------|
| SN-CN-LiPF <sub>6</sub>     | 0.10 ± 0.005           | 218.2 ± 5.4             |
| RILNs-3/1-LiPF <sub>6</sub> | 0.46 ± 0.009           | 285.8 ± 6.1             |
| RILNs-1/1-LiPF <sub>6</sub> | 0.87 ± 0.023           | 248.1 ± 7.4             |
| RILNs-1/3-LiPF <sub>6</sub> | 0.51 ± 0.012           | 128.3 ± 4.2             |
| SN-SS-LiPF <sub>6</sub>     | 0.32 ± 0.007           | 98.5 ± 4.0              |

**Table S5.** Ionic conductivities of the SPEs

| Temperature<br>(°C) | Ionic conductivity (10 <sup>-4</sup> S cm <sup>-1</sup> ) |                                 |                                 |                                 |                             |
|---------------------|-----------------------------------------------------------|---------------------------------|---------------------------------|---------------------------------|-----------------------------|
|                     | SN-CN-<br>LiPF <sub>6</sub>                               | RILNs-3/1-<br>LiPF <sub>6</sub> | RILNs-1/1-<br>LiPF <sub>6</sub> | RILNs-1/3-<br>LiPF <sub>6</sub> | SN-SS-<br>LiPF <sub>6</sub> |
| 25                  | 0.44                                                      | 6.97                            | 6.39                            | 5.95                            | 0.21                        |
| 30                  | 2.03                                                      | 8.41                            | 7.90                            | 7.05                            | 0.34                        |
| 40                  | 12.77                                                     | 12.3                            | 11.56                           | 10.31                           | 2.81                        |
| 50                  | 18.22                                                     | 17.5                            | 16.44                           | 15.08                           | 11.47                       |
| 60                  | 25.74                                                     | 25.00                           | 22.29                           | 20.95                           | 16.23                       |
| 70                  | 37.13                                                     | 34.10                           | 32.04                           | 28.58                           | 25.28                       |

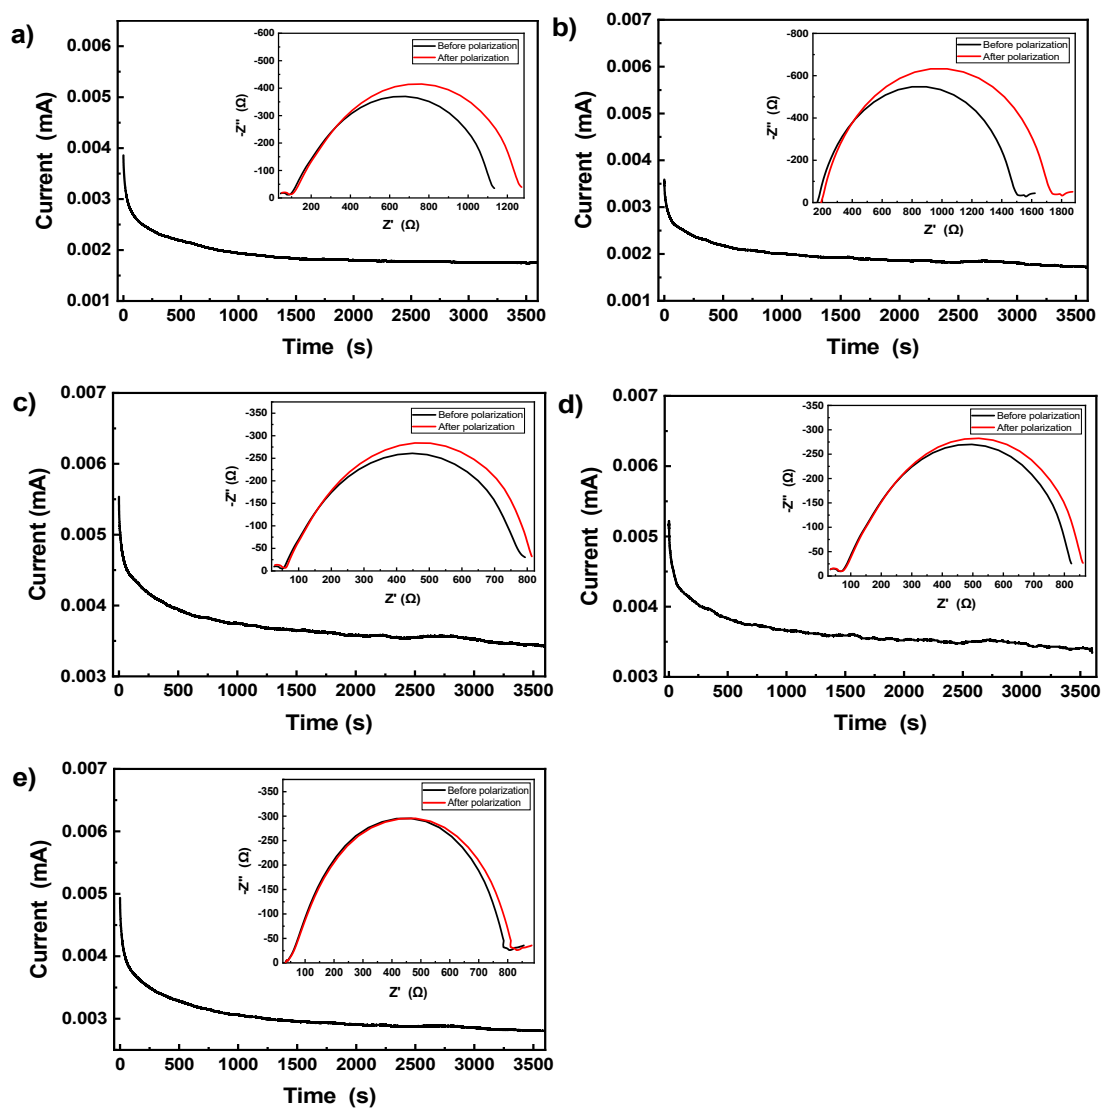

**Fig. S5.** Chronoamperometry profiles of the symmetric Li|SPE|Li cells with a polarization potential of 10 mV on the basis of (a) SN-CN-LiPF<sub>6</sub>, (b) SN-SS-LiPF<sub>6</sub>, (c) RILNs-3/1-LiPF<sub>6</sub>, (d) RILNs-1/1-LiPF<sub>6</sub> and (e) RILNs-1/3-LiPF<sub>6</sub>. The insets show the AC impedance spectra before and after polarization at 25 °C.

**Table S6.** Lithium-ion transference number of the SPEs calculated from **Fig. S5**

| Sample                      | $I_0$ (mA) | $I_s$ (mA) | $R_0$ ( $\Omega$ ) | $R_s$ ( $\Omega$ ) | $t_{Li^+}$ |
|-----------------------------|------------|------------|--------------------|--------------------|------------|
| SN-CN-LiPF <sub>6</sub>     | 0.00386    | 0.00175    | 1134               | 1273               | 0.33       |
| RILNs-3/1-LiPF <sub>6</sub> | 0.00553    | 0.00342    | 793                | 814                | 0.48       |
| RILNs-1/1-LiPF <sub>6</sub> | 0.00517    | 0.00301    | 823                | 861                | 0.45       |
| RILNs-1/3-LiPF <sub>6</sub> | 0.00493    | 0.00280    | 806                | 831                | 0.43       |
| SN-SS-LiPF <sub>6</sub>     | 0.00359    | 0.00169    | 1568               | 1806               | 0.30       |

Note:  $I_0$ , initial current;  $I_s$ , steady-state current;  $R_0$ , interfacial resistance before polarization;  $R_s$ , interfacial resistance after polarization.

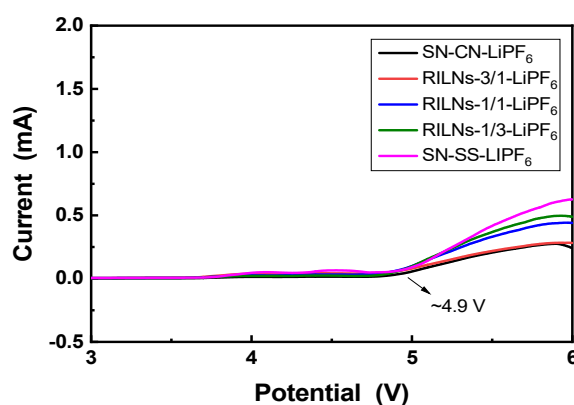

**Fig. S6.** LSV curves of the SPEs at 25 °C.

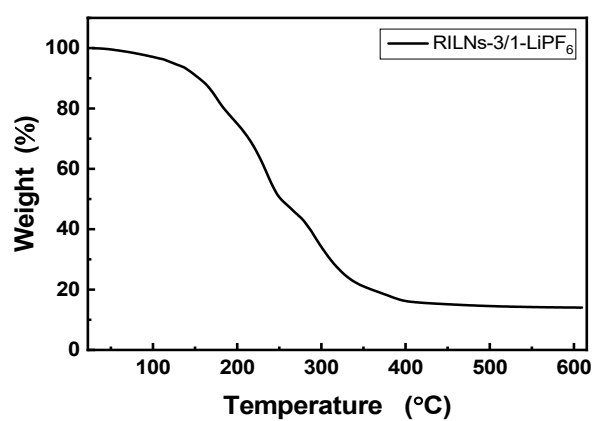

**Fig. S7.** The thermogravimetric curve of RILNs-3/1-LiPF<sub>6</sub>.

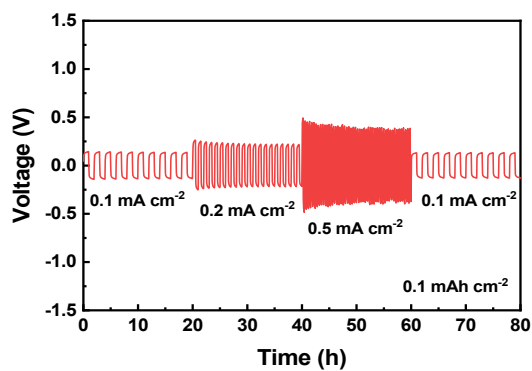

**Fig. S8.** Rate capability of the symmetric Li|RILNs-3/1-LiPF<sub>6</sub>|Li cell at 25 °C. The capacity was fixed at 0.1 mAh cm<sup>-2</sup>.

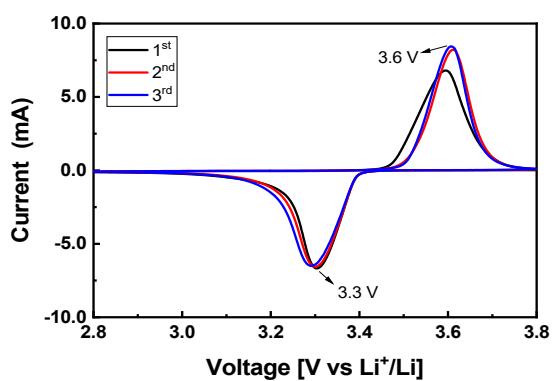

**Fig. S9.** CV curves of the Li|RILNs-3/1-LiPF<sub>6</sub>|LiFePO<sub>4</sub> cell measured at a scan rate of 0.1 mV s<sup>-1</sup>.

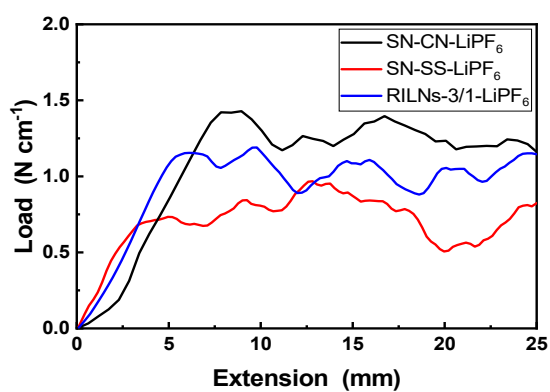

**Fig. S10.** Peel tests of the adhesion between the SPEs and lithium metal.



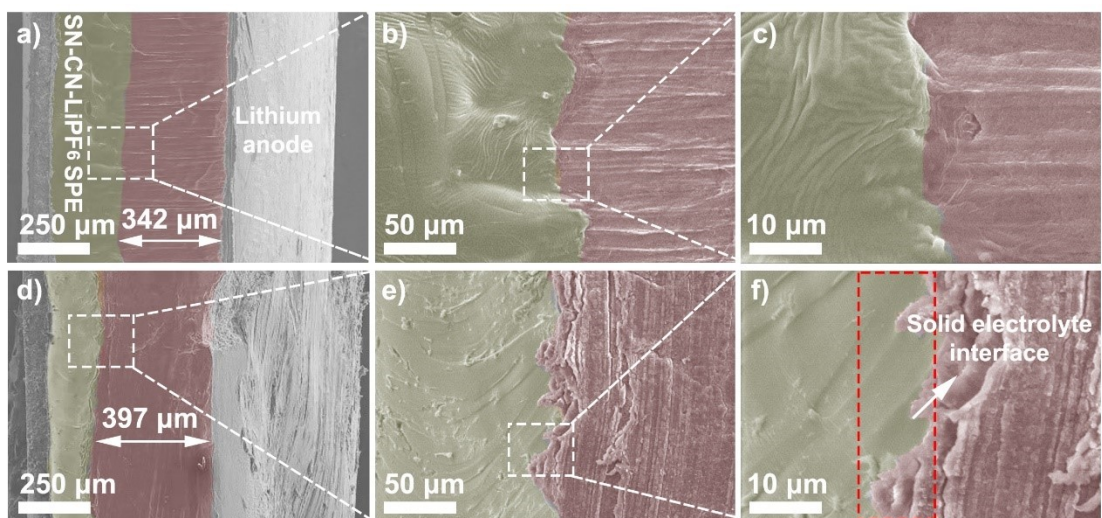

**Fig. S11.** SEM images of the cross-sections of Li|SN-CN-LiPF<sub>6</sub> (a, b, c) before and (d, e, f) after 50 cycles at 0.1 C. Note: The portions colored by light auburn denote the Li anode.

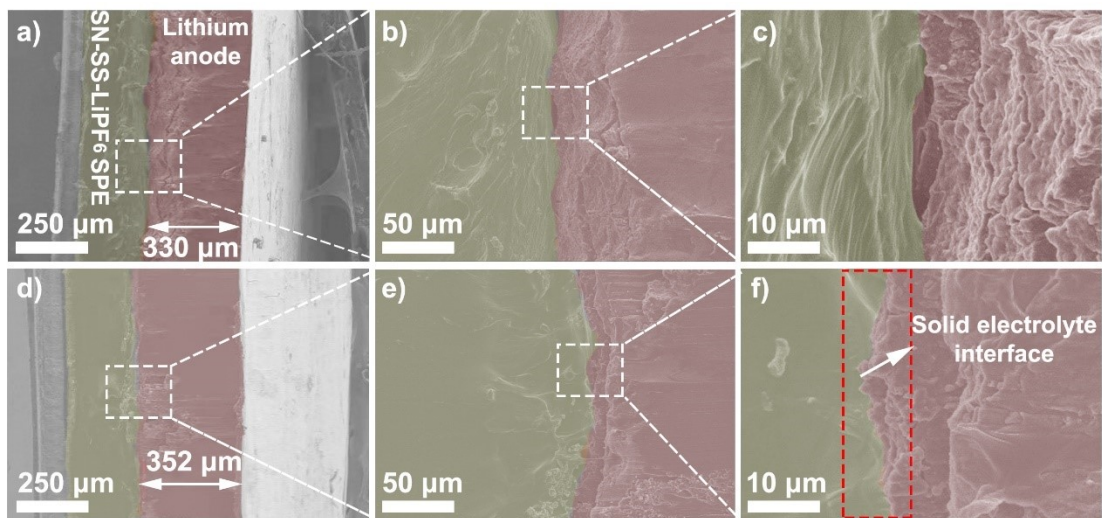

**Fig. S12.** SEM images of the cross-sections of Li|SN-SS-LiPF<sub>6</sub> (a, b, c) before and (d, e, f) after 50 cycles at 0.1 C. Note: The portions colored by light auburn denote the Li anode.

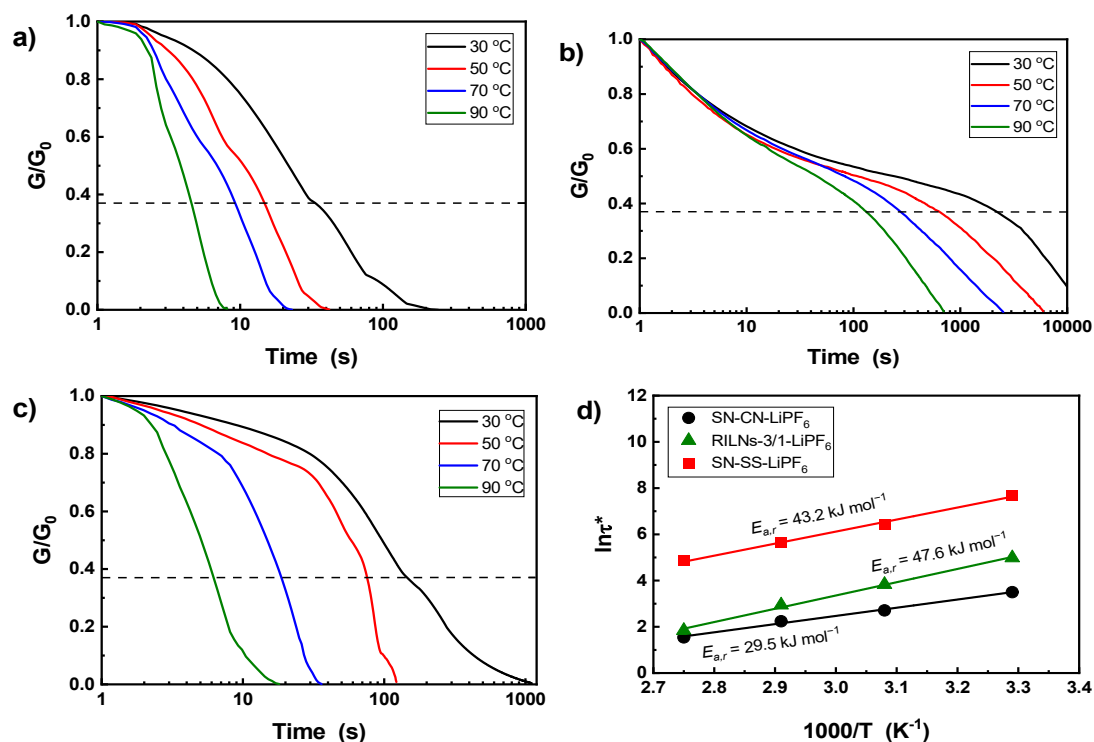

**Fig. S13.** Normalized stress relaxation of (a) SN-CN-LiPF<sub>6</sub>, (b) SN-SS-LiPF<sub>6</sub>, (c) RILNs-3/1-LiPF<sub>6</sub> as a function of temperature. (d) Fitting of the temperature dependences of the characteristic relaxation time,  $\tau^*$ , obtained from (a), (b) and (c) according to the Arrhenius equation.

**Table S7.**  $\tau^*$  and  $E_{a,r}$  of the SPEs obtained from **Fig. S13**

| Sample                      | $\tau^*$ (s) |        |        |         | $E_{a,r}$<br>(kJ mol <sup>-1</sup> ) |
|-----------------------------|--------------|--------|--------|---------|--------------------------------------|
|                             | 90 °C        | 70 °C  | 50 °C  | 30 °C   |                                      |
| SN-CN-LiPF <sub>6</sub>     | 4.65         | 9.42   | 15.06  | 32.82   | 29.5                                 |
| RILNs-3/1-LiPF <sub>6</sub> | 6.29         | 18.92  | 46.06  | 144.98  | 47.6                                 |
| SN-SS-LiPF <sub>6</sub>     | 130.11       | 280.18 | 626.37 | 2186.41 | 43.2                                 |

**Table S8.** Tensile properties and ionic conductivities of the original and healed RILNs-

3/1-LiPF<sub>6</sub>

| Samples name           | Tensile strength (M Pa) | Elongation at break (%) | Ionic conductivity at 25 °C (10 <sup>-4</sup> S cm <sup>-1</sup> ) | Healing efficiency <sup>a</sup> (%) | Healing efficiency <sup>b</sup> (%) |
|------------------------|-------------------------|-------------------------|--------------------------------------------------------------------|-------------------------------------|-------------------------------------|
| Virgin                 | 0.46                    | 285.5                   | 6.97                                                               | N/A                                 | N/A                                 |
| 1 <sup>st</sup> healed | 0.43                    | 269.9                   | 6.51                                                               | 94.5                                | 93.4                                |
| 2 <sup>nd</sup> healed | 0.40                    | 261.8                   | 6.09                                                               | 91.7                                | 87.4                                |
| 3 <sup>rd</sup> healed | 0.34                    | 238.0                   | 5.90                                                               | 83.4                                | 84.6                                |

<sup>a</sup> Calculated from the ratio of elongation at break of the healed specimen to that of the virgin specimen

<sup>b</sup> Calculated from the ratio of ionic conductivity of the healed specimen to that of the virgin specimen
